# Supplementary material for: Accurate 3-D radiative transfer simulation of spectral solar irradiance during the total solar eclipse of 21 August 2017
Source: Copernicus journal article supplement (doi:10.5194/acp-20-1961-2020), 2020-02-21
Supplement: Supplementary file 2 [file acp-20-1961-2020-supplement.zip]

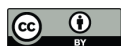

## *Supplement of*

# **Accurate 3-D radiative transfer simulation of spectral solar irradiance during the total solar eclipse of 21 August 2017**

**Paul Ockenfuß et al.**

*Correspondence to:* Paul Ockenfuß (paul.ockenfuss@physik.uni-muenchen.de)

- acp-20-1961-2020-supplement-title-page.pdf
- Fig16
  - IRSeries\_PlotValues.txt
  - UVSeries\_PlotValues.txt
  - VisSeries\_PlotValues.txt
  - Wv11020Clear.result
  - Wv1306Clear.result
  - Wv1315Clear.result
  - Wv1320Clear.result
  - Wv1340Clear.result
  - Wv1380Clear.result
  - Wv1395Clear.result
  - Wv1412Clear.result
  - Wv1443Clear.result
  - Wv1490Clear.result
  - Wv1532Clear.result
  - Wv1555Clear.result
  - Wv1665Clear.result
  - Wv1875Clear.result
  - Wv1940Clear.result
- Fig17
  - Spectrum\_PlotValues.txt
- ReadMe.pdf

The copyright of individual parts of the supplement might differ from the CC BY 4.0 License.
